# Supplementary material
Source: HighWire-hosted journal article supplement (https://bibliotheek.ehb.be/content/76/4/382)
Supplement: inline-supplementary-material-1 [file inline-supplementary-material-1.pdf]

**Table S1. Association of having slept rough in early adulthood with biomedical risk factors in middle age**

| Biomarker                            | Analytical sample size | Minimal adjustment <sup>a</sup> |              | Analytical sample size | Multivariable adjustment <sup>b</sup> |              |
|--------------------------------------|------------------------|---------------------------------|--------------|------------------------|---------------------------------------|--------------|
|                                      |                        | Coefficient                     | 95% CI       |                        | Coefficient                           | 95% CI       |
| Body mass index                      | 5,937                  | -1.75                           | -4.17, 0.66  | 5,708                  | -1.79                                 | -4.20, 0.60  |
| Systolic blood pressure, mm Hg       | 6,030                  | -3.73                           | -10.36, 2.90 | 5,798                  | -3.55                                 | -10.17, 3.06 |
| Diastolic blood pressure, mm Hg      | 6,030                  | -3.93                           | -8.93, 1.08  | 5,798                  | -3.76                                 | -8.78, 1.25  |
| Total cholesterol, mmol/L            | 4,914                  | 0.06                            | -0.44, 0.57  | 4,716                  | 0.02                                  | -0.48, 0.52  |
| HDL cholesterol, mmol/L              | 4,904                  | 0.03                            | -0.18, 0.24  | 4,706                  | 0.04                                  | -0.17, 0.26  |
| Triglycerides, mmol/L                | 2,776                  | 0.15                            | -0.74, 1.05  | 2,670                  | 0.11                                  | -0.79, 1.01  |
| Glycated hemoglobin, mmol/mol        | 4,860                  | 1.04                            | -3.46, 5.54  | 4,665                  | 0.78                                  | -3.74, 5.30  |
| Framingham risk score <sup>c</sup>   | 4,814                  | 0.04                            | 0.01, 0.06   | 4,619                  | 0.03                                  | 0.01, 0.05   |
| C-reactive protein, log units        | 2,747                  | 0.12                            | -0.55, 0.79  | 2,642                  | 0.08                                  | -0.58, 0.74  |
| Insulin-like growth factor 1, nmol/L | 2,771                  | -0.31                           | -3.38, 2.76  | 2,666                  | -0.28                                 | -3.34, 2.79  |

Abbreviations: CI, confidence interval; HDL, high-density lipoprotein; SD, standard deviation.

<sup>a</sup> Adjusted for age, sex, other types of homeless experience (staying in a hostel, bed and breakfast, sofa surfing, squatting, other place)

<sup>b</sup> Adjusted for age and sex plus socioeconomic disadvantage (leaving school aged <16 years old, highest educational achievement, being unemployed), psychiatric morbidity (Malaise score ≥7) and having seen doctor for psychiatric problem, smoking status, alcohol problems (CAGE score ≥2), lifetime illicit drug use and other types of homeless experience.

<sup>c</sup> Age, sex and current smoking not adjusted in the analyses of the Framingham risk score as they are used in its calculation.

**Table S2. Association of having stayed in a homeless shelter in early adulthood with biomedical risk factors in middle age**

| Biomarker                            | Analytical sample size | Minimal adjustment <sup>a</sup> |             | Analytical sample size | Multivariable adjustment <sup>b</sup> |             |
|--------------------------------------|------------------------|---------------------------------|-------------|------------------------|---------------------------------------|-------------|
|                                      |                        | Coefficient                     | 95% CI      |                        | Coefficient                           | 95% CI      |
| Body mass index                      | 5,937                  | 0.15                            | -0.24, 0.54 | 5,708                  | 0.10                                  | -0.29, 0.49 |
| Systolic blood pressure, mm Hg       | 6,030                  | 0.83                            | -0.22, 1.89 | 5,798                  | 0.83                                  | -0.24, 1.90 |
| Diastolic blood pressure, mm Hg      | 6,030                  | 0.65                            | -0.15, 1.45 | 5,798                  | 0.65                                  | -0.15, 1.46 |
| Total cholesterol, mmol/L            | 4,914                  | 0.04                            | -0.04, 0.11 | 4,716                  | 0.04                                  | -0.04, 0.12 |
| HDL cholesterol, mmol/L              | 4,904                  | -0.01                           | -0.05, 0.02 | 4,706                  | -0.01                                 | -0.04, 0.02 |
| Triglycerides, mmol/L                | 2,776                  | 0.06                            | -0.09, 0.21 | 2,670                  | 0.05                                  | -0.10, 0.20 |
| Glycated hemoglobin, mmol/mol        | 4,860                  | 0.08                            | -0.61, 0.77 | 4,665                  | -0.09                                 | -0.80, 0.61 |
| Framingham risk score <sup>c</sup>   | 4,814                  | -0.01                           | -0.01, 0.01 | 4,619                  | 0.00                                  | -0.01, 0.01 |
| C-reactive protein, log units        | 2,747                  | 0.09                            | -0.02, 0.21 | 2,642                  | 0.09                                  | -0.02, 0.20 |
| Insulin-like growth factor 1, nmol/L | 2,771                  | 0.11                            | -0.40, 0.62 | 2,666                  | 0.13                                  | -0.39, 0.65 |

Abbreviations: CI, confidence interval; HDL, high-density lipoprotein; SD, standard deviation.

<sup>a</sup> Adjusted for age, sex, other types of homeless experience (staying in a rough sleeping, bed and breakfast, sofa surfing, squatting, other place)

<sup>b</sup> Adjusted for age and sex plus socioeconomic disadvantage (leaving school aged <16 years old, highest educational achievement, being unemployed), psychiatric morbidity (Malaise score  $\geq 7$ ) and having seen doctor for psychiatric problem, smoking status, alcohol problems (CAGE score  $\geq 2$ ), lifetime illicit drug use and other types of homeless experience.

<sup>c</sup> Age, sex and current smoking not adjusted in the analyses of the Framingham risk score as they are used in its calculation.

**Table S3. Association of having stayed in a bed and breakfast in early adulthood with biomedical risk factors in middle age**

| Biomarker                            | Analytical sample size | Minimal adjustment <sup>a</sup> |             | Analytical sample size | Multivariable adjustment <sup>b</sup> |             |
|--------------------------------------|------------------------|---------------------------------|-------------|------------------------|---------------------------------------|-------------|
|                                      |                        | Coefficient                     | 95% CI      |                        | Coefficient                           | 95% CI      |
| Body mass index                      | 5,937                  | 0.58                            | 0.13, 1.03  | 5,708                  | 0.59                                  | 0.13, 1.05  |
| Systolic blood pressure, mm Hg       | 6,030                  | 0.36                            | -0.93, 1.55 | 5,798                  | 0.12                                  | -1.12, 1.36 |
| Diastolic blood pressure, mm Hg      | 6,030                  | 0.63                            | -0.27, 1.53 | 5,798                  | 0.39                                  | -0.55, 1.33 |
| Total cholesterol, mmol/L            | 4,914                  | -0.06                           | -0.15, 0.02 | 4,716                  | -0.06                                 | -0.15, 0.03 |
| HDL cholesterol, mmol/L              | 4,904                  | -0.03                           | -0.06, 0.01 | 4,706                  | -0.02                                 | -0.05, 0.02 |
| Triglycerides, mmol/L                | 2,776                  | 0.07                            | -0.08, 0.23 | 2,670                  | 0.04                                  | -0.12, 0.20 |
| Glycated hemoglobin, mmol/mol        | 4,860                  | 0.36                            | -0.43, 1.15 | 4,665                  | 0.26                                  | -0.55, 1.08 |
| Framingham risk score <sup>c</sup>   | 4,814                  | -0.01                           | -0.01, 0.01 | 4,619                  | 0.00                                  | -0.01, 0.01 |
| C-reactive protein, log units        | 2,747                  | 0.18                            | 0.06, 0.29  | 2,642                  | 0.16                                  | 0.04, 0.29  |
| Insulin-like growth factor 1, nmol/L | 2,771                  | -0.06                           | -0.59, 0.47 | 2,666                  | 0.02                                  | -0.52, 0.56 |

Abbreviations: CI, confidence interval; HDL, high-density lipoprotein; SD, standard deviation.

<sup>a</sup> Adjusted for age, sex, other types of homeless experience (rough sleeping, staying in a hostel, sofa surfing, squatting, other place)

<sup>b</sup> Adjusted for age and sex plus socioeconomic disadvantage (leaving school aged <16 years old, highest educational achievement, being unemployed), psychiatric morbidity (Malaise score  $\geq 7$ ) and having seen doctor for psychiatric problem, smoking status, alcohol problems (CAGE score  $\geq 2$ ), lifetime illicit drug use and other types of homeless experience.

<sup>c</sup> Age, sex and current smoking not adjusted in the analyses of the Framingham risk score as they are used in its calculation.

**Table S4. Association of having sofa surfed in early adulthood with biomedical risk factors in middle age**

| Biomarker                            | Analytical sample size | Minimal adjustment <sup>a</sup> |              | Analytical sample size | Multivariable adjustment <sup>b</sup> |             |
|--------------------------------------|------------------------|---------------------------------|--------------|------------------------|---------------------------------------|-------------|
|                                      |                        | Coefficient                     | 95% CI       |                        | Coefficient                           | 95% CI      |
| Body mass index                      | 5,937                  | 0.45                            | -0.31, 1.20  | 5,708                  | 0.44                                  | -0.32, 1.19 |
| Systolic blood pressure, mm Hg       | 6,030                  | -1.33                           | -3.38, 0.71  | 5,798                  | -1.36                                 | -3.43, 0.71 |
| Diastolic blood pressure, mm Hg      | 6,030                  | -1.02                           | -2.56, 0.52  | 5,798                  | -1.13                                 | -2.70, 0.44 |
| Total cholesterol, mmol/L            | 4,914                  | -0.01                           | -0.17, 0.14  | 4,716                  | -0.07                                 | -0.23, 0.08 |
| HDL cholesterol, mmol/L              | 4,904                  | -0.09                           | -0.15, -0.02 | 4,706                  | -0.07                                 | -0.13, 0.01 |
| Triglycerides, mmol/L                | 2,776                  | 0.10                            | -0.22, 0.41  | 2,670                  | -0.06                                 | -0.38, 0.25 |
| Glycated hemoglobin, mmol/mol        | 4,860                  | 0.36                            | -1.03, 1.76  | 4,665                  | -0.08                                 | -1.49, 1.33 |
| Framingham risk score <sup>c</sup>   | 4,814                  | 0.00                            | -0.01, 0.01  | 4,619                  | 0.01                                  | -0.01, 0.01 |
| C-reactive protein, log units        | 2,747                  | 0.05                            | -0.18, 0.28  | 2,642                  | -0.03                                 | -0.26, 0.21 |
| Insulin-like growth factor 1, nmol/L | 2,771                  | -0.63                           | -1.69, 0.43  | 2,666                  | -0.29                                 | -1.36, 0.78 |

Abbreviations: CI, confidence interval; HDL, high-density lipoprotein; SD, standard deviation.

<sup>a</sup> Adjusted for age, sex, other types of homeless experience (rough sleeping, staying in a hostel, bed and breakfast, squatting, other place)

<sup>b</sup> Adjusted for age and sex plus socioeconomic disadvantage (leaving school aged <16 years old, highest educational achievement, being unemployed), psychiatric morbidity (Malaise score  $\geq 7$ ) and having seen doctor for psychiatric problem, smoking status, alcohol problems (CAGE score  $\geq 2$ ), lifetime illicit drug use and other types of homeless experience.

<sup>c</sup> Age, sex and current smoking not adjusted in the analyses of the Framingham risk score as they are used in its calculation.

**Table S5. Association of having squatted in early adulthood with biomedical risk factors in middle age**

| Biomarker                            | Analytical sample size | Minimal adjustment <sup>a</sup> |              | Analytical sample size | Multivariable adjustment <sup>b</sup> |              |
|--------------------------------------|------------------------|---------------------------------|--------------|------------------------|---------------------------------------|--------------|
|                                      |                        | Coefficient                     | 95% CI       |                        | Coefficient                           | 95% CI       |
| Body mass index                      | 5,937                  | -1.73                           | -3.13, -0.32 | 5,708                  | -1.69                                 | -3.08, -0.29 |
| Systolic blood pressure, mm Hg       | 6,030                  | -2.83                           | -6.68, 1.03  | 5,798                  | -2.78                                 | -6.62, 1.07  |
| Diastolic blood pressure, mm Hg      | 6,030                  | 0.03                            | -2.88, 2.94  | 5,798                  | -0.02                                 | -2.94, 2.90  |
| Total cholesterol, mmol/L            | 4,914                  | -0.19                           | -0.52, 0.14  | 4,716                  | -0.20                                 | -0.53, 0.13  |
| HDL cholesterol, mmol/L              | 4,904                  | -0.04                           | -0.18, 0.10  | 4,706                  | -0.04                                 | -0.17, 0.10  |
| Triglycerides, mmol/L                | 2,776                  | -0.35                           | -1.00, 0.30  | 2,670                  | -0.36                                 | -1.02, 0.28  |
| Glycated hemoglobin, mmol/mol        | 4,860                  | -0.31                           | -3.26, 2.64  | 4,665                  | -0.52                                 | -3.47, 2.43  |
| Framingham risk score <sup>c</sup>   | 4,814                  | 0.00                            | -0.01, 0.01  | 4,619                  | -0.01                                 | -0.02, 0.00  |
| C-reactive protein, log units        | 2,747                  | 0.06                            | -0.43, 0.54  | 2,642                  | 0.11                                  | -0.37, 0.59  |
| Insulin-like growth factor 1, nmol/L | 2,771                  | 2.09                            | -0.13, 4.33  | 2,666                  | 2.15                                  | -0.08, 4.37  |

Abbreviations: CI, confidence interval; HDL, high-density lipoprotein; SD, standard deviation.

<sup>a</sup> Adjusted for age, sex, other types of homeless experience (rough sleeping, staying in a hostel, bed and breakfast, sofa surfing, other place)

<sup>b</sup> Adjusted for age and sex plus socioeconomic disadvantage (leaving school aged <16 years old, highest educational achievement, being unemployed), psychiatric morbidity (Malaise score ≥7) and having seen doctor for psychiatric problem, smoking status, alcohol problems (CAGE score ≥2), lifetime illicit drug use and other types of homeless experience.

<sup>c</sup> Age, sex and current smoking not adjusted in the analyses of the Framingham risk score as they are used in its calculation.

**Table S6. Association of having stayed in other places in early adulthood with biomedical risk factors in middle age**

| Biomarker                            | Analytical sample size | Minimal adjustment <sup>a</sup> |             | Analytical sample size | Multivariable adjustment <sup>b</sup> |             |
|--------------------------------------|------------------------|---------------------------------|-------------|------------------------|---------------------------------------|-------------|
|                                      |                        | Coefficient                     | 95% CI      |                        | Coefficient                           | 95% CI      |
| Body mass index                      | 5,937                  | 1.32                            | -0.15, 2.79 | 5,708                  | 1.29                                  | -0.20, 2.77 |
| Systolic blood pressure, mm Hg       | 6,030                  | 0.28                            | -3.69, 4.24 | 5,798                  | 0.50                                  | -3.53, 4.52 |
| Diastolic blood pressure, mm Hg      | 6,030                  | -1.16                           | -4.16, 1.83 | 5,798                  | -1.18                                 | -4.23, 1.88 |
| Total cholesterol, mmol/L            | 4,914                  | -0.17                           | -0.46, 0.12 | 4,716                  | -0.24                                 | -0.53, 0.05 |
| HDL cholesterol, mmol/L              | 4,904                  | -0.10                           | -0.22, 0.02 | 4,706                  | -0.10                                 | -0.22, 0.02 |
| Triglycerides, mmol/L                | 2,776                  | 0.15                            | -0.34, 0.64 | 2,670                  | 0.06                                  | -0.44, 0.54 |
| Glycated hemoglobin, mmol/mol        | 4,860                  | 1.25                            | -1.33, 3.82 | 4,665                  | 0.94                                  | -1.67, 3.55 |
| Framingham risk score <sup>c</sup>   | 4,814                  | 0.01                            | -0.01, 0.01 | 4,619                  | 0.00                                  | -0.02, 0.01 |
| C-reactive protein, log units        | 2,747                  | 0.01                            | -0.36, 0.38 | 2,642                  | -0.02                                 | -0.39, 0.35 |
| Insulin-like growth factor 1, nmol/L | 2,771                  | -0.50                           | -2.18, 1.19 | 2,666                  | -0.27                                 | -1.95, 1.42 |

Abbreviations: CI, confidence interval; HDL, high-density lipoprotein; SD, standard deviation.

<sup>a</sup> Adjusted for age, sex, other types of homeless experience (rough sleeping, staying in a hostel, bed and breakfast, sofa surfing, squatting).

<sup>b</sup> Adjusted for age and sex plus socioeconomic disadvantage (leaving school aged <16 years old, highest educational achievement, being unemployed), psychiatric morbidity (Malaise score  $\geq 7$ ) and having seen doctor for psychiatric problem, smoking status, alcohol problems (CAGE score  $\geq 2$ ), lifetime illicit drug use and other types of homeless experience.

<sup>c</sup> Age, sex and current smoking not adjusted in the analyses of the Framingham risk score as they are used in its calculation.

**Table S7. Association of having been homelessness in early adulthood with biomedical risk factors in the sample with no missing data (n = 2662)**

| Biomarker                            | Homeless,<br>Mean (SD) |                | Age- and sex-adjusted |              | Adjusted <sup>a</sup> |             |
|--------------------------------------|------------------------|----------------|-----------------------|--------------|-----------------------|-------------|
|                                      | No                     | Yes            | Coefficient           | 95% CI       | Coefficient           | 95% CI      |
| Body mass index                      | 28.52 (5.46)           | 28.88 (6.09)   | 0.43                  | -0.46, 1.32  | 0.33                  | -0.57, 1.24 |
| Systolic blood pressure, mm Hg       | 125.08 (15.55)         | 122.13 (15.02) | -1.80                 | -4.19, 0.58  | -1.80                 | -4.24, 0.63 |
| Diastolic blood pressure, mm Hg      | 77.66 (11.47)          | 75.62 (12.58)  | -1.51                 | -3.34, 0.32  | -1.41                 | -3.28, 0.46 |
| Total cholesterol, mmol/L            | 5.36 (0.97)            | 5.27 (1.01)    | -0.06                 | -0.22, 0.09  | -0.09                 | -0.26, 0.06 |
| HDL cholesterol, mmol/L              | 1.52 (0.44)            | 1.45 (0.38)    | -0.09                 | -0.15, -0.02 | -0.06                 | -0.13, 0.01 |
| Triglycerides, mmol/L                | 1.86 (1.24)            | 1.90 (1.40)    | 0.14                  | -0.05, 0.33  | 0.01                  | -0.19, 0.19 |
| Glycated hemoglobin, mmol/mol        | 36.68 (7.89)           | 36.61 (5.24)   | 0.11                  | -1.14, 1.37  | 0.33                  | -1.59, 0.95 |
| Framingham risk score <sup>b</sup>   | 5.56 (4.60)            | 5.45 (5.35)    | -0.01                 | -0.01, 0.01  | -0.01                 | -0.01, 0.01 |
| C-reactive protein, log units        | 0.15 (1.06)            | 0.38 (1.09)    | 0.23                  | 0.05, 0.39   | 0.16                  | -0.01, 0.34 |
| Insulin-like growth factor 1, nmol/L | 18.45 (4.98)           | 17.86 (4.93)   | -0.52                 | -1.33, 0.28  | -0.16                 | -0.98, 0.66 |

Abbreviations: CI, confidence interval; HDL, high-density lipoprotein; SD, standard deviation.

<sup>a</sup> Adjusted for age and sex plus socioeconomic disadvantage (leaving school aged <16 years old, highest educational achievement, being unemployed), psychiatric morbidity (Malaise score ≥7) and having seen doctor for psychiatric problem, smoking status, alcohol problems (CAGE score ≥2) and lifetime illicit drug use.

<sup>b</sup> Age, sex and current smoking not adjusted in the analyses of the Framingham risk score as they are used in its calculation.
